# Supplementary material
Source: Springer Nature journal article supplement (https://www.springermedizin.de/resource/supplementary/12936_2006_265_MOESM5_ESM.pdf/9547340)

Day 1

Day 2

Day 3

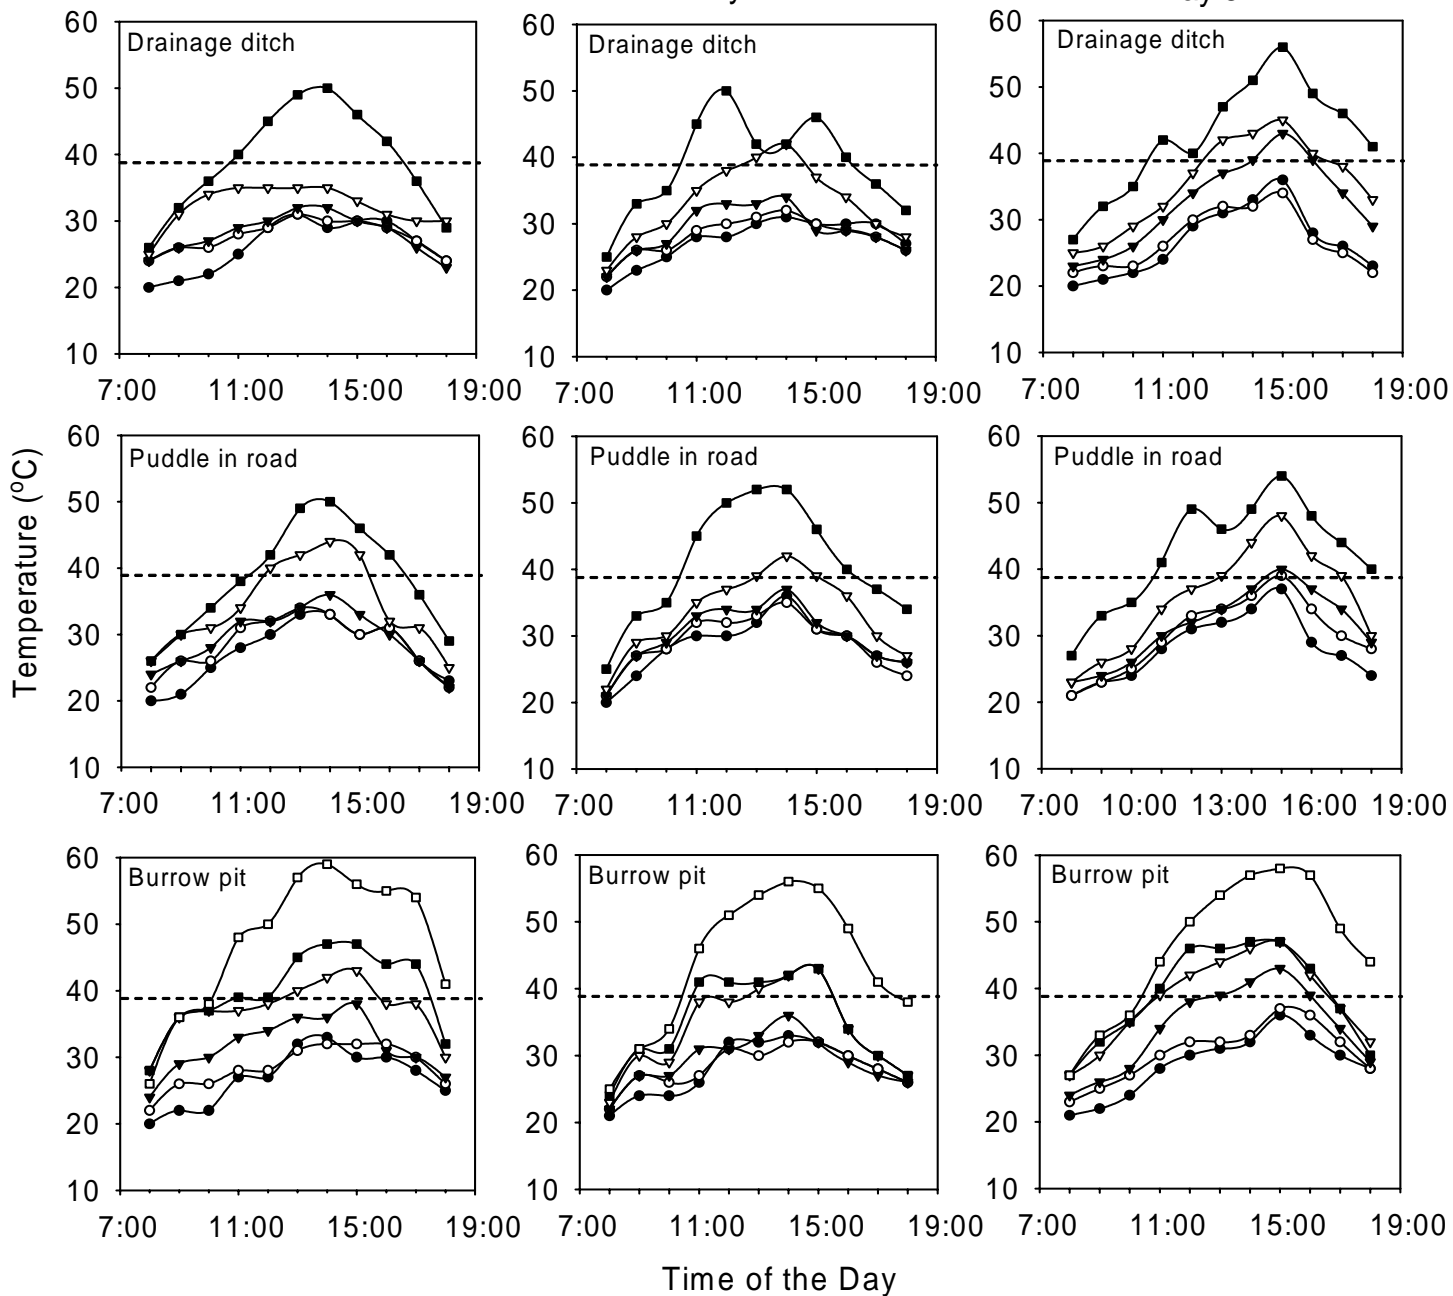

dry soil

wet mud

water surface

wet-dry mud line

water line

dry rock

Supplement: MOESM5 [file 9547340]
